# Supplementary material for: Pathological levels of glucosylceramide change the biophysical properties of artificial and cell membranes
Source: Royal Society of Chemistry journal article supplement (doi:10.1039/c6cp07227e), 2016-11-22
Supplement: c6cp07227e1.pdf [file c6cp07227e1.pdf]

Supporting Information for: **Pathological levels of Glucosylceramide change the biophysical properties of artificial and cell membranes**

Ana R.P. Varela<sup>a,b,c</sup>, Ana E. Ventura<sup>a,b,c</sup>, Ana C. Carreira<sup>a,d</sup>, Aleksander Fedorov<sup>b</sup>, Anthony H. Futerman<sup>c</sup>, Manuel Prieto<sup>b</sup>, Liana C. Silva<sup>a,\*</sup>

<sup>a</sup> **iMed.Ulisboa** – Research Institute for Medicines, Faculdade de Farmácia, Universidade de Lisboa, Av. Prof. Gama Pinto, 1649-003 Lisboa, Portugal

<sup>b</sup> **Centro de Química-Física Molecular and Institute of Nanoscience and Nanotechnology**, Instituto Superior Técnico, Universidade de Lisboa, Av. Rovisco Pais, 1049-001 Lisboa, Portugal

<sup>c</sup> **Department of Biomolecular Sciences**, Weizmann Institute of Science, Rehovot 76100, Israel

<sup>d</sup> **Centro de Química e Bioquímica**, DQB, Faculdade de Ciências, Universidade de Lisboa, Campo Grande, 1749-016 Lisboa, Portugal

**Table 1. Composition of the studied mixtures.** The molar ratio of POPC, C16-SM and Chol in mixtures without or with 5 or 10 mol% of GlcCer is shown. The fraction of the  $I_o$  phase,  $X_{I_o}$ , of the ternary mixtures, is also shown.

| $X_{I_o}$ | Without GlcCer |              |            | 5 mol% GlcCer |              |            | 10 mol% GlcCer |              |            |
|-----------|----------------|--------------|------------|---------------|--------------|------------|----------------|--------------|------------|
|           | $X_{POPC}$     | $X_{C16-SM}$ | $X_{Chol}$ | $X_{POPC}$    | $X_{C16-SM}$ | $X_{Chol}$ | $X_{POPC}$     | $X_{C16-SM}$ | $X_{Chol}$ |
| 0         | 0.72           | 0.23         | 0.05       | 0.68          | 0.22         | 0.05       | 0.64           | 0.21         | 0.05       |
| 0.26      | 0.60           | 0.26         | 0.14       | 0.60          | 0.25         | 0.13       | 0.54           | 0.24         | 0.13       |
| 0.51      | 0.45           | 0.30         | 0.25       | 0.43          | 0.28         | 0.24       | 0.41           | 0.27         | 0.23       |
| 0.84      | 0.34           | 0.33         | 0.33       | 0.32          | 0.31         | 0.32       | 0.31           | 0.29         | 0.30       |
| 0.98      | 0.25           | 0.35         | 0.40       | 0.24          | 0.33         | 0.38       | 0.23           | 0.31         | 0.36       |
| 1.00      | 0.15           | 0.37         | 0.48       | 0.14          | 0.36         | 0.45       | 0.14           | 0.34         | 0.43       |

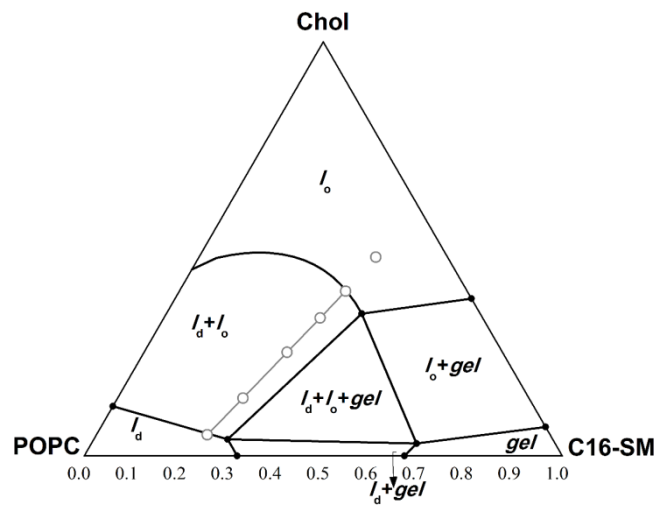

**Figure S1 - POPC/C16-SM/Chol ternary phase diagram**

The grey line is a tie-line that contains a 1:1:1 POPC/C16-SM/Chol mixture. The grey dots correspond to the mixtures used in this study. (adapted from de Almeida *et al.*(1)).

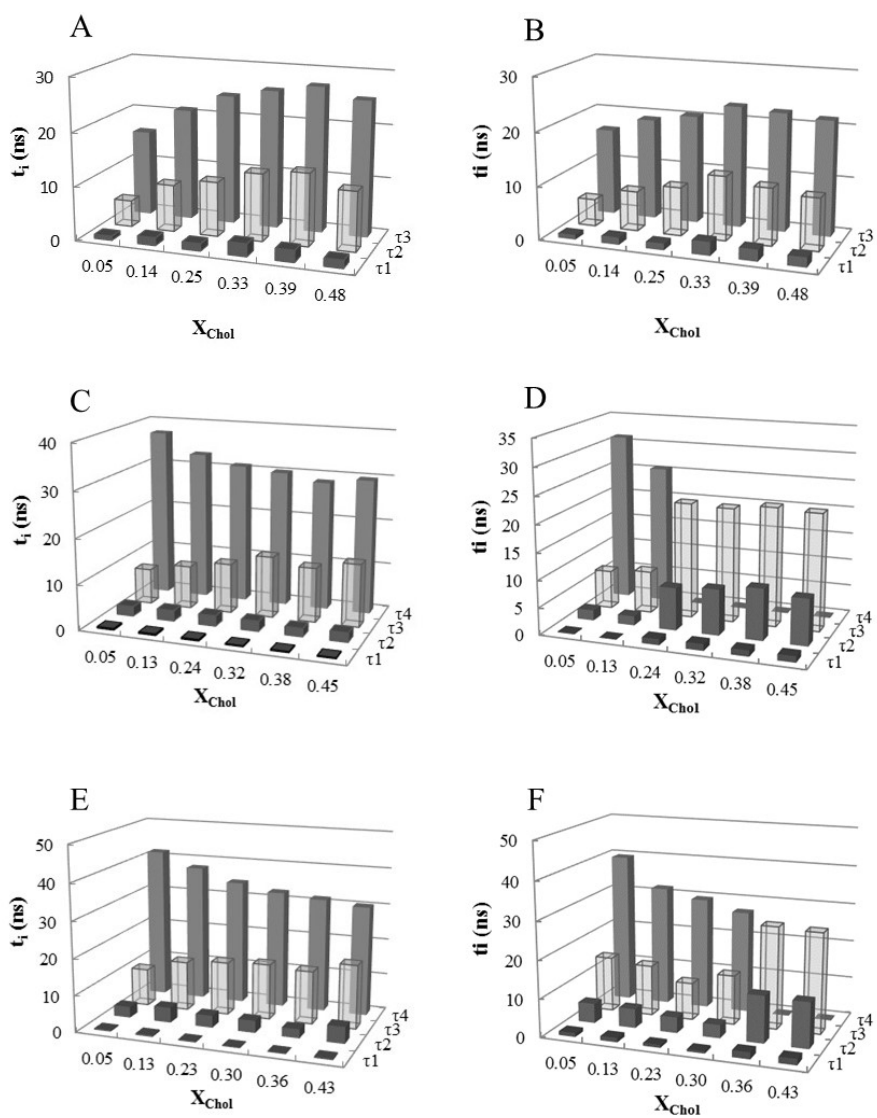

**Figure S2 - Analysis of t-PnA fluorescence intensity decay components in POPC/C16-SM/Chol and POPC/C16-SM/Chol/C16-GlcCer mixtures.**

Variation of the lifetime components of t-PnA intensity decay, in POPC/C16-SM/Chol mixtures containing (A, B) 0, (C, D) 5 and (E, F) 10 mol% of C16-GlcCer. Measurements were performed at pH 7.4 (A, C, E) or at pH 5.5 (B, D, F). Values are means  $\pm$  SD of at least 3 independent experiments.

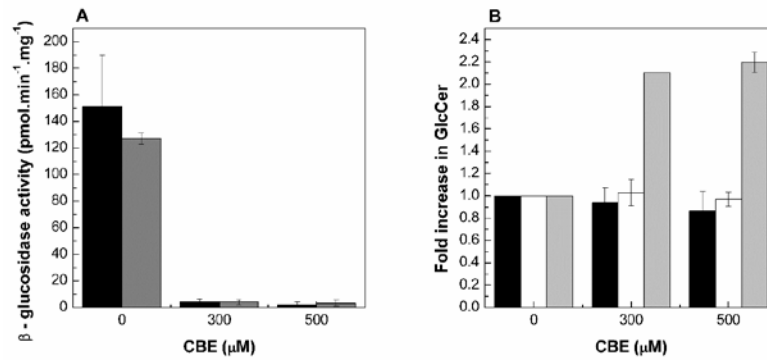

**Figure S3 – CBE-induced glucosidase inhibition and GlcCer accumulation.**

(A) Activity of  $\beta$ -glucosidase in control cells and cells treated with different concentrations of CBE after 1 (black bars) and 2 (gray bars) days of incubation. Inhibition of the enzyme results in (B) time (1 day – black bars; 3 days – white bars; 6 days – light gray bars) and CBE concentration-dependent increase in GlcCer levels.

## References

1. de Almeida RFM, Fedorov A, Prieto M (2003) Sphingomyelin/Phosphatidylcholine/Cholesterol Phase Diagram: Boundaries and Composition of Lipid Rafts. *Biophys J* 85(4):2406–2416.
